# Supplementary material for: Methodische Vorgehensweisen bei der Ermittlung und Beurteilung psychischer Belastung in der betrieblichen Praxis
Source: Atypon-hosted journal article supplement (doi:10.1026/0932-4089/a000269), 2018-06-12
Supplement: 0932-4089_a000269_esm1.pdf [file 0932-4089_a000269_esm1.pdf]

## Fragen / Themen

- 1) Hintergrundinfos zum **Unternehmen** (Größe, Organisation, Leistungsspektrum, Arbeitsschutzorganisation) und zu Ihrer eigenen Funktion/Rolle
- 2) Welchen **Tätigkeiten** gehen die Beschäftigten bei <<Unternehmen>> nach und was sind aus Ihrer Sicht **zentrale Belastungen/Gefährdungen** ihrer Arbeit? Haben sich die Arbeitsbelastungen in dem Zeitraum, den Sie persönlich überblicken, verändert?
- 3) Wie/Warum kam das **Thema psychische Belastung** bei <<Unternehmen>> auf die Agenda?
- 4) Wie werden die Arbeitsbedingungen im Hinblick auf die psychische Belastung gegenwärtig bei der <<Unternehmen>> konkret beurteilt?
  - Vorgehensweisen/Methoden/Instrumente und Akteure, einbezogene Belastungsfaktoren (was wurde konkret beurteilt?), ggf. festgestellte kritische Belastungen bzw. Handlungserfordernisse
  - Einbindung in bestehende Strukturen des Arbeitsschutzes und der Gefährdungsbeurteilung
- 5) Wie wurde bisher mit den Ergebnissen aus der Beurteilung der Arbeitsbedingungen umgegangen? Welches **weitere Vorgehen** ist geplant?
- 6) Wie bewerten Sie den bisherigen Prozess im Hinblick auf **Praktikabilität und Nutzen**?
- 7) Zeit für **Ihre Fragen** an uns...

Wenn möglich, bringen Sie gerne **Unterlagen und Dokumentationen** zur Gefährdungsbeurteilung mit zum Gespräch (z.B. ggf. eingesetzte Instrumente, Ergebnisberichte, etwaige Betriebsvereinbarungen zum Vorgehen, etc.).

*Anmerkung:* Die Antworten auf die Fragen 4 und 5 enthielten im Wesentlichen die Informationen, die diesem Beitrag zugrunde liegen. Der Erzählfluss der Interviewteilnehmer wurde jeweils durch Verständnisfragen und konkrete Nachfragen, wie z.B. Wie war das konkret? Können Sie mir das einem Beispiel erläutern?, aufrechterhalten.
