# Supplementary material for: Methodische Vorgehensweisen bei der Ermittlung und Beurteilung psychischer Belastung in der betrieblichen Praxis
Source: Atypon-hosted journal article supplement (doi:10.1026/0932-4089/a000269), 2018-06-12
Supplement: 0932-4089_a000269_esm2.pdf [file 0932-4089_a000269_esm2.pdf]

Elektronisches Supplement 2: *Tabelle ES\_1*. Beispiel für die Beziehungen zwischen Textebene und Fallberichtsebene

Steigende Abstraktion/ zunehmende Verdichtung des Materials 

Zitatebene

Paraphrasierung Ebene 1

Paraphrasierung Ebene Fallbericht

*Geschäftsführer eines kleinen sozialen Unternehmens*

(spontane) Thematisierung von psychischen

Belastung wird offenkundig gemacht durch:

Zitat 1: „Die erzählen sich aus der Praxis, was für Probleme sie mit Familien haben, so eine Art kollegiale Beratung. Ähnlich wie Supervision, aber auf einer anderen Ebene, wo es dann mehr drum geht: "Warum machst du denn das so?", oder: "Mach das so". Die [Teamsitzungen] sind in der Regel zwei Stunden. Da kann alles besprochen werden, was den Arbeitsbereich betrifft, was Ärger betrifft, was Raumprobleme betrifft. Das wird in den [Teamsitzungen] genannt, wenn Räume nicht funktionieren, wenn immer wieder die Toilette verstopft ist, wer ist da schuld dran, wie kann man das ändern, solche Dinge. Die Themen kriegen Protokoll. Und das wird dann/ Also ich bin für die Räume verantwortlich, Raumfragen werden an mich weitergeleitet zum Beispiel. Wenn es da Probleme gibt, dann versuche ich das zu lösen.“

Belastungen in regelmäßigen (protokollierten) Teamgesprächen, "eine Art kollegiale Beratung", mit Weiterleitung an Verantwortliche

- Thematisierung in regelmäßigen Teamgesprächen (Führungskräfte geben es weiter an Geschäftsführung bzw. andere Verantwortliche)  
 - anlassbezogene Gespräche mit betroffenen Mitarbeitern  
 - Sensibilität für auffälliges Verhalten und Befinden von Mitarbeitern, dem dann in direkten Gesprächen *oder in der Supervision nachgegangen wird ("man kriegt das irgendwie mit")*  
*(Anm.: der kursiv gedruckte Teil der Paraphrase entstammt einem anderen Zitat)*

Zitat 2: „I: Und wie würden Sie das rausfinden, wenn da was zwischen Mitarbeitern ist?

B: Das kriegen die [Führungskräfte] mit in den Teams. Oder wenn wir [Geschäftsführung] es hören, wenn wir es mitkriegen und denken, die können nicht miteinander, dann würde man auch versuchen, dass die beiden nicht mehr zusammen arbeiten, erstmal. Es gibt aber Situationen, wo das nicht anders geht, dass sie zusammenarbeiten, das ist in jedem Betrieb so. Wenn wir den Eindruck hätten, die kriegen das hin, auch wenn sie sich gerade hassen, dann würden wir sagen, dann sollen sie es machen. Aber wir würden ihnen dann vorher Unterstützung anbieten und sagen: "Wenn es überhaupt nicht geht, dann müssen wir diese Mediation uns angucken. Und wenn es überhaupt nicht geht, dann müssen wir das halt trennen." Also weil, es geht ja um Arbeit mit Menschen, also wenn jemand Sanitärinstallateur ist, kann man sagen, die Toilette merkt das nicht, wenn die beiden gerade so sind. Aber wenn man ein Familiengespräch hat, dann geht das einfach nicht, ne?“

Geschäftsführung erhält Informationen über Probleme von den Führungskräften oder direkt ("wenn wir es hören, wenn wir es mitkriegen"), direkte Lösung auf Basis eigener Reflexionen, Geschäftsführung verschafft sich einen Eindruck von dem Ausmaß des Problems, Unterstützungsangebot, das Mitarbeiter in Anspruch nehmen können

Elektronisches Supplement 2: *Tabelle ES\_2*. Beispiele für die Entwicklung von Kategorien aus den Fallberichten zu den Kriterien, hinsichtlich derer die herausgearbeiteten Vorgehensweisen differenziert werden

| Ebene Fallbericht                                                                                                                                                                                                                                                                                                                                                                                                                                                                                                                                                                                                                                                                                                                                                                                         | Abstrahierung                                                                                                                                                                                                                                                                                                                                                             | Thema 1: Ausgangspunkt                                                                                                                                                                                                                     | Thema 2: Art der Erkenntnisprozesse                                                       |
|-----------------------------------------------------------------------------------------------------------------------------------------------------------------------------------------------------------------------------------------------------------------------------------------------------------------------------------------------------------------------------------------------------------------------------------------------------------------------------------------------------------------------------------------------------------------------------------------------------------------------------------------------------------------------------------------------------------------------------------------------------------------------------------------------------------|---------------------------------------------------------------------------------------------------------------------------------------------------------------------------------------------------------------------------------------------------------------------------------------------------------------------------------------------------------------------------|--------------------------------------------------------------------------------------------------------------------------------------------------------------------------------------------------------------------------------------------|-------------------------------------------------------------------------------------------|
| <p>Fall A: <u>Ermittlung</u></p> <p>Thematisierung/Erfassung von Belastungen/ Gefährdungen durch Beschäftigte und/oder Führungskräfte in:</p> <ul style="list-style-type: none"> <li>• <b>monatlichen Büromeetings</b>: hier wird aktiv erfragt, ob es Probleme gibt</li> <li>• <b>Jahresmitarbeitergesprächen</b>: hier wird Beschäftigten Raum gegeben, Probleme selbst anzusprechen</li> </ul> <p>GL/unsere Gesprächspartnerin beobachtet Entwicklung von AU-Tagen, gesundheitlichen Befinden und Überstunden der Beschäftigten. Bei Auffälligkeiten <b>sucht sie aktiv das Gespräch mit den betroffenen Angestellten</b> und prüft, ob bzw. inwiefern dafür (auch) Ursachen in der Arbeitsbelastung/in Arbeitsbedingungen liegen.</p> <p>Unsere Gesprächspartnerin macht <b>regelmäßige Rund-</b></p> | <p>Gruppengespräche: regelmäßig, terminiert (monatliche Büromeetings)</p> <p>Einzelgespräche: terminiert (Jahresmitarbeitergespräch), spontan (Gespräche bei Rundgängen, Ansprechpartner „Kummerkasten“), anlassbezogen (sucht aktiv das Gespräch bei Auffälligkeiten in der AU-Tage-Entwicklung oder bei Überstunden)</p> <p>Beobachtungen: spontan (bei Rundgängen)</p> | <p>Wahrgenommene und geäußerte Probleme (aktiv erfragt, ob es Probleme gibt, fragt nach Befinden und Belastung, bei Auffälligkeiten in der AU-Tage-Entwicklung oder Überstunden sucht Akteur aktiv das Gespräch zur Ursachenforschung)</p> | <p>Kommunikativ-reflexiv (im Gespräch mit den Mitarbeitern, aus Beobachtungen heraus)</p> |

---

**gänge** zu allen Beschäftigten an den Arbeitsplatz und fragt nach Befinden und Belastung => wird allerdings nicht dokumentiert

Sie bietet sich den Beschäftigten als „**Kummerkasten**“ an, als Schnittstelle von GL und Belegschaft. **Insbesondere jüngere MA sprechen Probleme ihr ggü. eigeninitiativ an**, weil sie wissen, dass unsere Gesprächspartnerin die Probleme ernst nimmt und diese in Abstimmung mit der GL weiter verfolgt

Alle Probleme werden in einem **zentralen Aufgabenspeicher erfasst**, der zum Quartalsende mit der GL durchgesprochen wird. Erledigung wird nachverfolgt und an Mitarbeiter zurück gemeldet

Beurteilung:

Eine systematische Beurteilung anhand definierter Kriterien findet nicht statt. Ob Handlungsbedarf vorliegt oder nicht, entscheiden Beschäftigte und GL je nach geäußertem/wahrgenommen Leidensdruck.

|                                                                                                                                                                                                                                                                                                                                                                                                                                                                                                                                                                                                                                                                                                                                                                                                                                                                                                                                                                                              |                                                                                                                                                                                                                                                                    |                                                                                                                                                                                                                                                                                                     |                                                                                                                                                                                                                                                                                                                                                                                                                                                                                                                                 |
|----------------------------------------------------------------------------------------------------------------------------------------------------------------------------------------------------------------------------------------------------------------------------------------------------------------------------------------------------------------------------------------------------------------------------------------------------------------------------------------------------------------------------------------------------------------------------------------------------------------------------------------------------------------------------------------------------------------------------------------------------------------------------------------------------------------------------------------------------------------------------------------------------------------------------------------------------------------------------------------------|--------------------------------------------------------------------------------------------------------------------------------------------------------------------------------------------------------------------------------------------------------------------|-----------------------------------------------------------------------------------------------------------------------------------------------------------------------------------------------------------------------------------------------------------------------------------------------------|---------------------------------------------------------------------------------------------------------------------------------------------------------------------------------------------------------------------------------------------------------------------------------------------------------------------------------------------------------------------------------------------------------------------------------------------------------------------------------------------------------------------------------|
| <p>Fall B:</p> <p><u>Ermittlung:</u></p> <p><b>-Vorabinterviews</b> mit Teil der Belegschaft. Alle Geschäftsbereiche/ Abteilungen beteiligt (um bei anschließender Fragebogengestaltung auf besondere, in den Interviews geäußerte Belastungen eingehen zu können).</p> <p>Auf Basis der Interviews und dem dort Geäußerten wurden <b>verschiedene Fragebögen für die Abteilungen</b> entwickelt. Auch die interne Steuerungsgruppe, die sich für die Durchführung der Gefährdungsbeurteilung psychischer Belastung gegründet hatte, vermutete aufgrund ihrer Erfahrungen mit den Tätigkeiten und Bedingungen kritische Ausprägungen für bestimmte Belastungsfaktoren für die ausgewählten Abteilungen und brachte dieses Wissen in die Entwicklung der Fragebögen ein.</p> <p>4 stufige Likert-Skala+ Freitexte</p> <p>Mitarbeiter hatten 3 Wochen Zeit, den Fragebogen auszufüllen und in eine Urne einzuwerfen. Diese wurde dem externen Berater geschickt. Eine Erinnerungsmail kurz</p> | <p>B.1.) Einzelgespräche (Interviews, terminiert, Ziel: Was sind spezifische Belastungen in den Abteilungen?)</p> <p>B.2.) Mitarbeiterbefragung (mit Fragebogen, der aus Ergebnissen von A) erstellt wurde)</p> <p>B.3.) Freitexte in der Mitarbeiterbefragung</p> | <p><i>B.1.) Anm.: Gestaltung des Vorabinterviews war für Untersucher nicht einsichtig, kann rückwirkend nicht erschlossen werden</i></p> <p>B.2.) Set von „Belastungen“, für die quantitative Ausprägungen erhoben werden sollen</p> <p>B.3.) spezifische Äußerungen zu Belastungen ermöglichen</p> | <p>B.1.) kommunikativ (in Interviews wird nach Belastungen gefragt) – reflexiv (es wird reflektiert, welches die spezifischen Belastungen für die Abteilungen sind)</p> <p>B.2.) folgt quantitativer „Forschungslogik“ und ihren Abläufen: Fragebögen verteilen, Rücklauf, Angaben quantitativ auswerten, darauf aufbauend Gewichtung der Belastungen anhand von Antworthäufigkeiten/ Anteilen</p> <p>B.3.) folgt qualitativer „Forschungslogik“: ergebnisoffen, inhaltliche Auswertung und Aufbereitung, nicht quantitativ</p> |
|----------------------------------------------------------------------------------------------------------------------------------------------------------------------------------------------------------------------------------------------------------------------------------------------------------------------------------------------------------------------------------------------------------------------------------------------------------------------------------------------------------------------------------------------------------------------------------------------------------------------------------------------------------------------------------------------------------------------------------------------------------------------------------------------------------------------------------------------------------------------------------------------------------------------------------------------------------------------------------------------|--------------------------------------------------------------------------------------------------------------------------------------------------------------------------------------------------------------------------------------------------------------------|-----------------------------------------------------------------------------------------------------------------------------------------------------------------------------------------------------------------------------------------------------------------------------------------------------|---------------------------------------------------------------------------------------------------------------------------------------------------------------------------------------------------------------------------------------------------------------------------------------------------------------------------------------------------------------------------------------------------------------------------------------------------------------------------------------------------------------------------------|

vor Ablauf der Abgabefrist wurde an die Mitarbeiter  
verschickt.

Beurteilung:

Die Auswertung führte der **externe Berater** durch. Dieser  
hat die Ergebnisse wie folgt dargestellt:

2-3 seitige Zusammenfassung (Ergebnisdiagramme und  
kurze Texte)

**Freitextfelder präsentiert**

Bei Fragen mit negativen Ausschlägen wurden diese mit  
Prozentangaben im Diagramm dargestellt und die Frei-  
textfelder mitangegeben

**Negative Ausschläge bis 30% als unbedenklich gewer-  
tet (in Abhängigkeit von Gruppengröße). Ab 40%**

**Handlungsbedarf definiert. Jedoch wurde die konkre-  
te Frage und Kontext betrachtet.**

Es ließen sich Bereiche als kritisch definieren, die jedoch  
nicht in den Maßnahmen angegangen werden (können)  
z.B. die Gehaltsstruktur. Den Mitarbeitern wird trotzdem  
eine Rückmeldung gegeben.

|                                                                                                                                                                                                                                                                                                                                                                                                                                                                                                                                                       |                                                                                   |                                                                                                                                                                                                                                                   |                                                                                                                                                                                                                                                                                                       |
|-------------------------------------------------------------------------------------------------------------------------------------------------------------------------------------------------------------------------------------------------------------------------------------------------------------------------------------------------------------------------------------------------------------------------------------------------------------------------------------------------------------------------------------------------------|-----------------------------------------------------------------------------------|---------------------------------------------------------------------------------------------------------------------------------------------------------------------------------------------------------------------------------------------------|-------------------------------------------------------------------------------------------------------------------------------------------------------------------------------------------------------------------------------------------------------------------------------------------------------|
| <p>Fall C:</p> <p><u>Ermittlung:</u></p> <p>Entscheidung für ein <b>orientierendes Verfahren: Fragebogen und Diskussion der Ergebnisse</b> in Kleingruppen. Zunächst Vergleich mehrerer Fragebögen. Dann Entscheidung für das [<b>Instrument eines Sozialpartners</b>], weil es als „am aussagekräftigsten, am umfassendsten und am passendsten“ empfunden wurde. 4-Punkt-Skala wurde als präziser bewertet als nur Ja/Nein-Kategorien.</p>                                                                                                           | <p>C.1.) Mitarbeiterbefragung (mit angepasstem Fragebogen)</p>                    | <p>C.1.) im Fragebogen abgefragte Konstrukte psychischer Belastung (z.B. Arbeitsorganisation, Betriebsklima, Umgebungseinflüsse, Handlungsspielraum)</p>                                                                                          | <p>C.1.) folgt quantitativer „Forschungslogik“ und ihren Abläufen: Fragebögen verteilen, Rücklauf, Angaben quantitativ auswerten (mit Excel entsprechend Auswertungstool), darauf aufbauend Gewichtung der Belastungen anhand von Anteilen der Beschäftigten, die Auftreten der Belastung bejahen</p> |
| <p>Kriterium für die Wahl des Instruments: Können alle Mitarbeiter mit den Fragen etwas anfangen?</p> <p><b>Fragebogen wurde auf das Unternehmen angepasst</b>, z.B. Fragen zur Schichtarbeit entfernt, weil es nur eine Normalschicht gibt. Einige Fragen wurden umformuliert</p> <p><u>Beurteilung:</u></p> <p><b>Eigenständige Auswertung des Fragebogens mit Excel (mitgeliefertes Auswertungstool)</b>, Bewertungsformel nach dem Ampelprinzip, vorgegeben vom Instrument</p> <p><b>(gelb: 33-66% geben an, dass eine Fehlbelastung vor-</b></p> | <p>C.2.) Diskussion der Ergebnisse in Arbeitsgruppen (Produktion, Verwaltung)</p> | <p>C.2.) Diskussion der Ergebnisse aus der Mitarbeiterbefragung anhand <i>konkreter Erfahrungen</i> der Beschäftigten mit den abgefragten Belastungen (diese sollen entscheiden, ob kritische Bereiche tatsächlich eine Belastung darstellen)</p> | <p>C.2.) diskursiv, kommunikativ (Mitarbeiter diskutieren und bewerten die Ergebnisse anhand ihrer Erfahrungen)</p>                                                                                                                                                                                   |

**liegt, rot: >66% geben an, dass eine Fehlbelastung vorliegt)**

Gesamtergebnisse werden zunächst vor dem ASA und den Führungskräften präsentiert.

Danach Ergebnisauswertung pro Tätigkeitsbereich. Ergebnisse für Produktionsarbeitsplätze werden in den Produktionsbereichen präsentiert, Ergebnisse der Büroarbeitsplätze in den Arbeitsgruppen mit Bürotätigkeiten.

**Arbeitsgruppen sollen danach eigenständig im Gespräch entscheiden, ob kritische Bereiche „nur auf dem Papier“ bestehen oder wirklich „als belastend wahrgenommen werden“ und somit aus Sicht der Beschäftigten Handlungsbedarf besteht.**

Ergebnisse wurden auch der Betriebsärztin und dem Mitarbeiter bei der zuständigen Berufsgenossenschaft zugespielt, aber bisher noch kein Feedback bzw. konkrete Maßnahmenvorschläge erhalten.

In den Arbeitsgruppen **Erarbeitung von Maßnahmen** (teils schon umgesetzt).
